# Supplementary material for: Molecular niobium(v) complexes with mononuclear {Nb1} and dinuclear oxo species {Nb2O} connected through aryl di- or tetra-carboxylate linker
Source: Royal Society of Chemistry journal article supplement (doi:10.1039/d2ce00828a), 2022-01-01
Supplement: d2ce00828a1.pdf [file d2ce00828a1.pdf]

## SUPPORTING INFORMATION

### **Molecular niobium(V) complexes with mononuclear {Nb<sub>1</sub>} and dinuclear oxo species {Nb<sub>2</sub>O} connected through aryl di- or tetra-carboxylate linker**

**Despoina Andriotou,<sup>a</sup> Sylvain Duval<sup>a,\*</sup> Xavier Trivelli<sup>b</sup>, Christophe Volkringer<sup>a</sup> and Thierry Loiseau<sup>a</sup>**

*Contribution from*

*<sup>a</sup>Unité de Catalyse et Chimie du Solide (UCCS) – UMR CNRS 8181, Université de Lille, Centrale Lille, Université d'Artois, F-59000 Lille, France.*

*<sup>b</sup>Univ. Lille, CNRS, INRAE, Centrale Lille, Univ. Artois, FR 2638 – IMEC – Institut Michel-Eugène Chevreul, Lille, 59000, France.*

\* To whom correspondence should be addressed. E-mail: [sylvain.duval@univ-lille.fr](mailto:sylvain.duval@univ-lille.fr), Phone: (33) 3 20 43 40 13, Fax: (33) 3 20 43 48 95.

*To be submitted CrystEngComm.*

Version 17 june, 2022

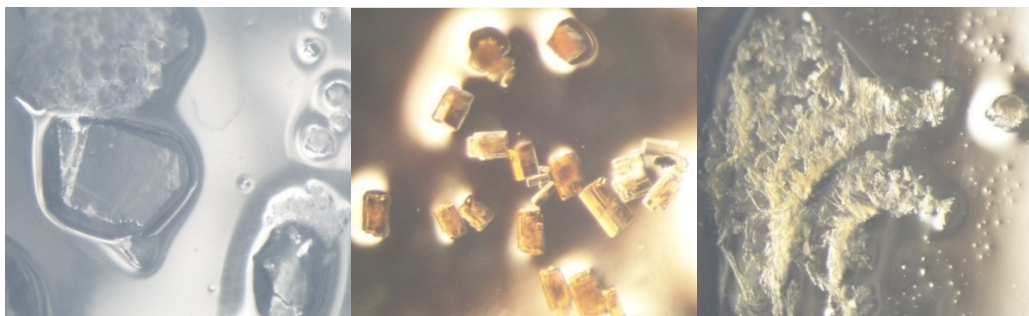

**Figure S1.** Optical microscope photographs of crystals of complex **1** (left), complex **2** (middle) and complex **3** (right).

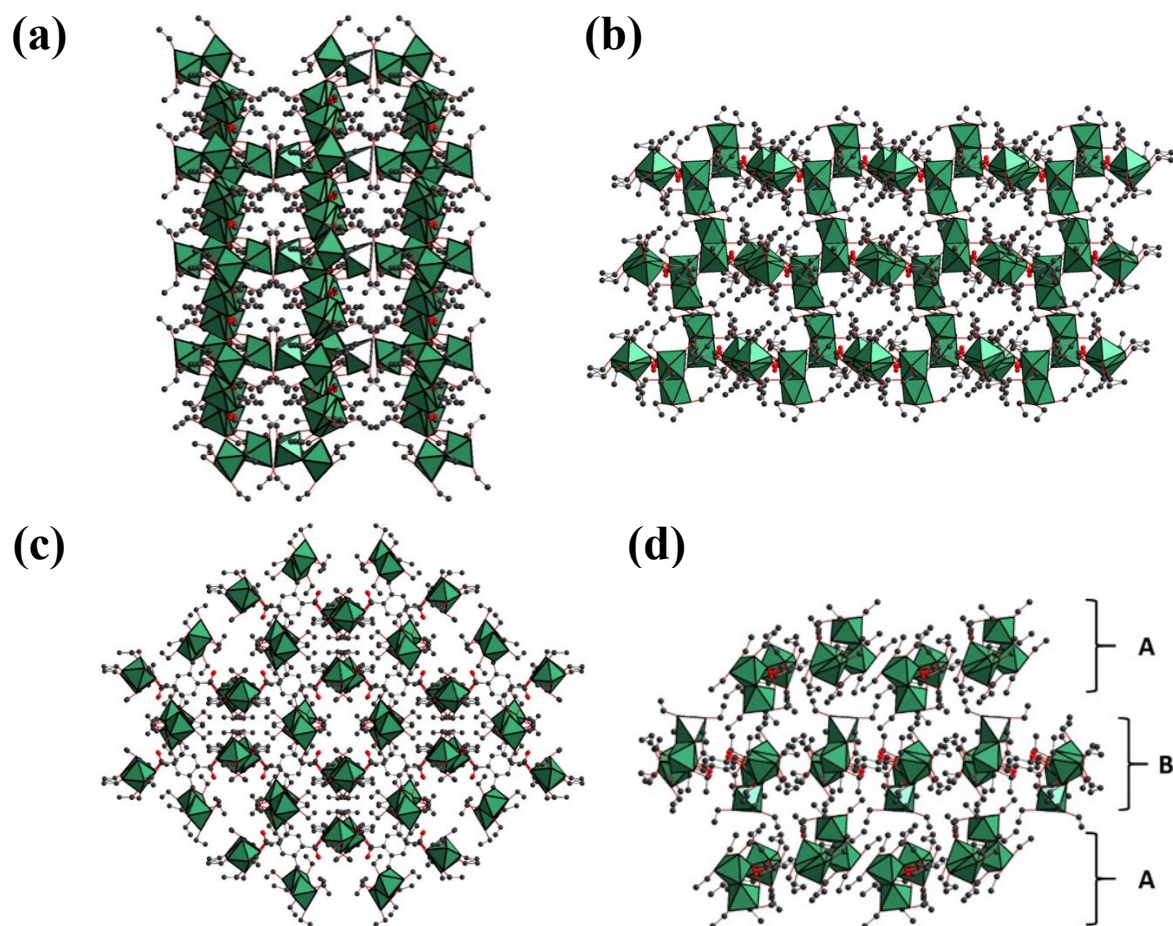

**Figure S2a.** Representation of the packing in the lattice of compound **1**. (a): view along the *a* axis; (b): view along the *b* axis; (c): view along the *c* axis and (d): view of the packing showing the A-B-A-B arrangement along the 110 direction.

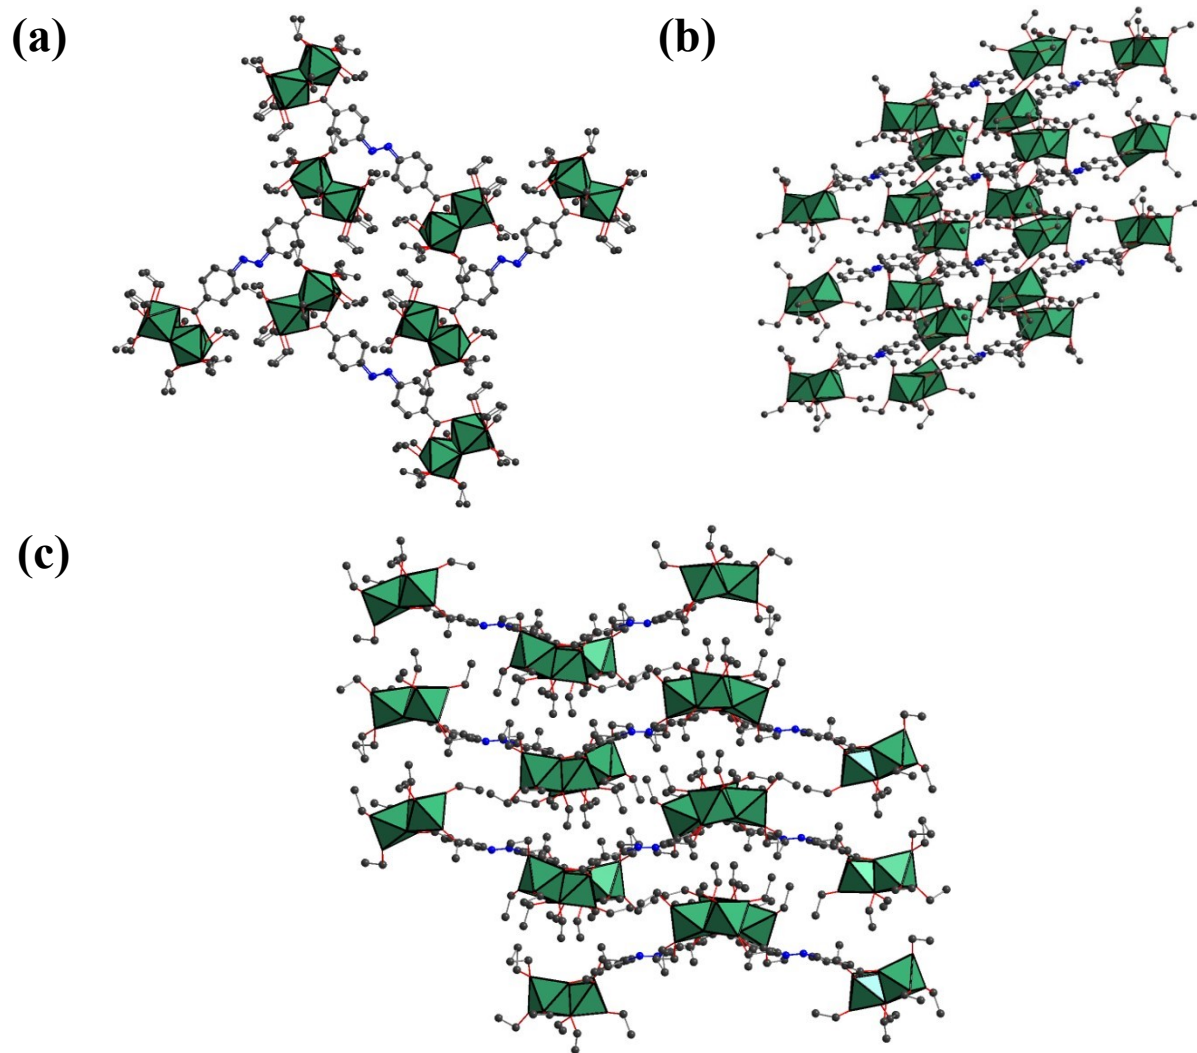

**Figure S2b.** Representation of the packing in the lattice of compound **2**. (a): view along the *a* axis; (b): view along the *b* axis; (c): view along the *c* axis.

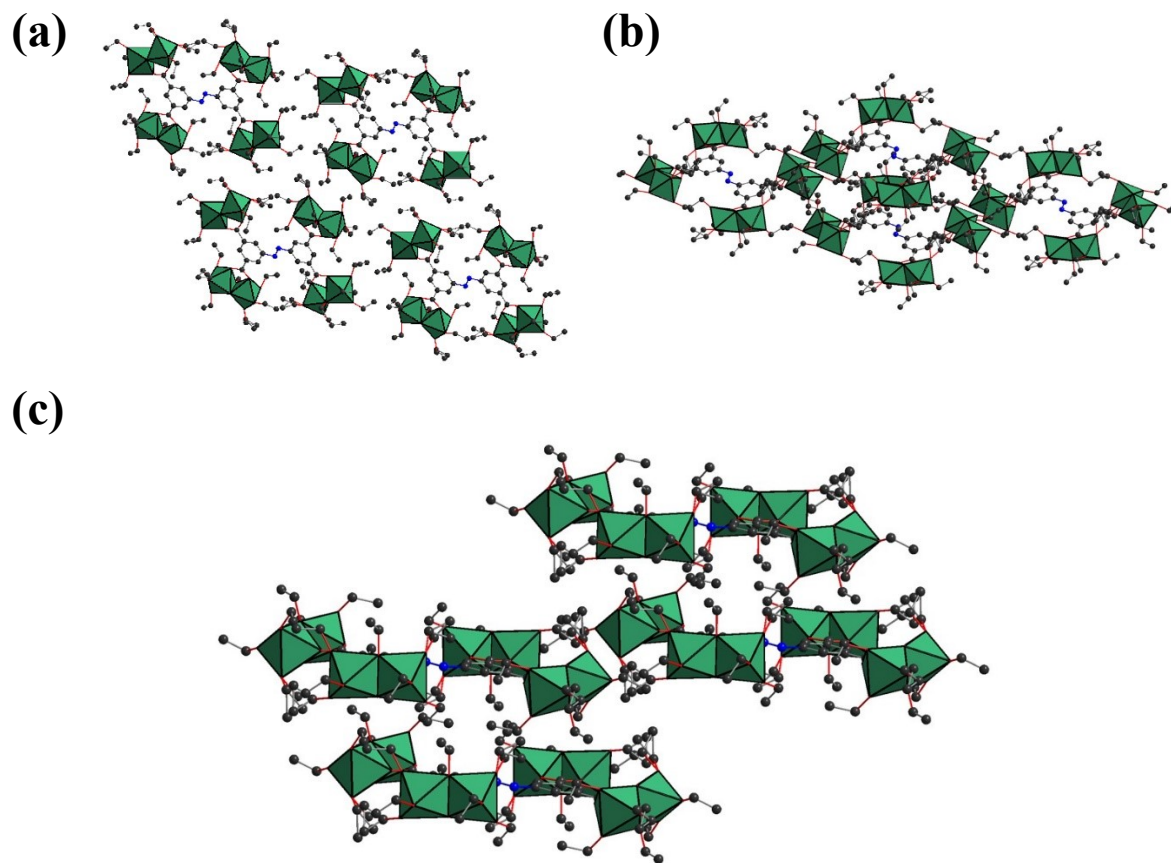

**Figure S2c.** Representation of the packing in the lattice of compound **2**. (a): view along the *a* axis; (b): view along the *b* axis; (c): view along the *c* axis.

## Powder XRD patterns

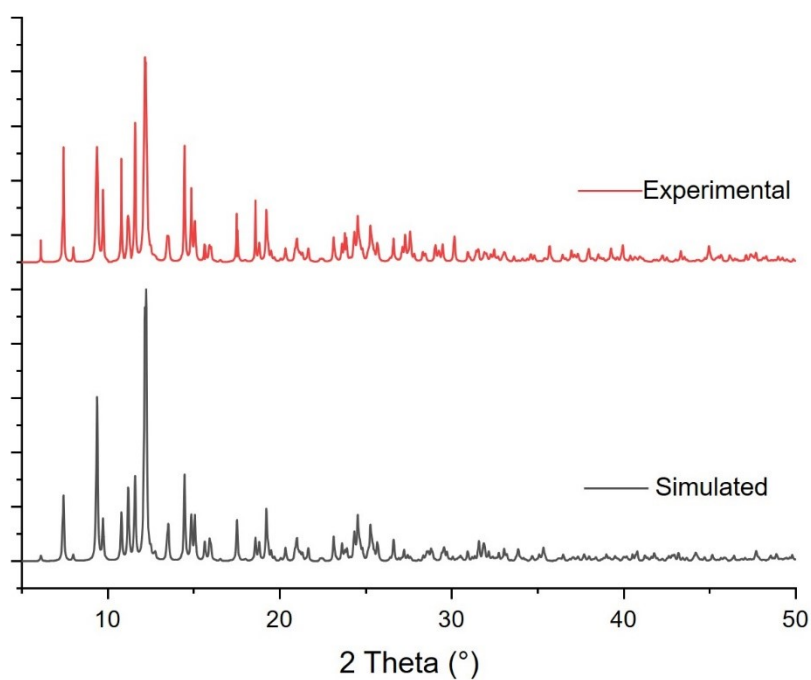

**Figure S3a.** Comparison of the experimental powder XRD pattern (red line) of complex **1** with the calculated one (black line). X-ray source; Copper  $K\alpha$  radiation.

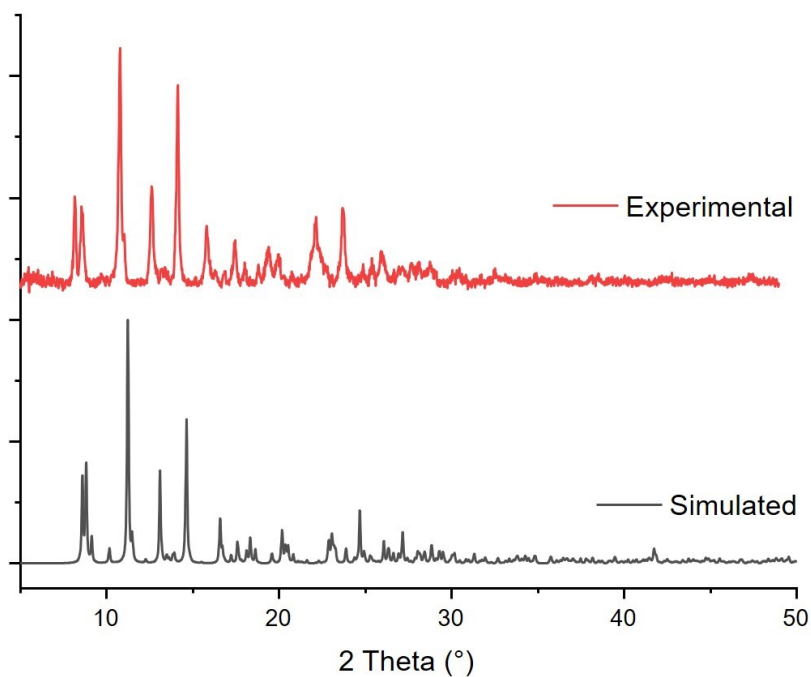

**Figure S3b.** Comparison of the experimental powder XRD pattern (red line) of complex **2** with the calculated one (black line). X-ray source; Copper  $K\alpha$  radiation.

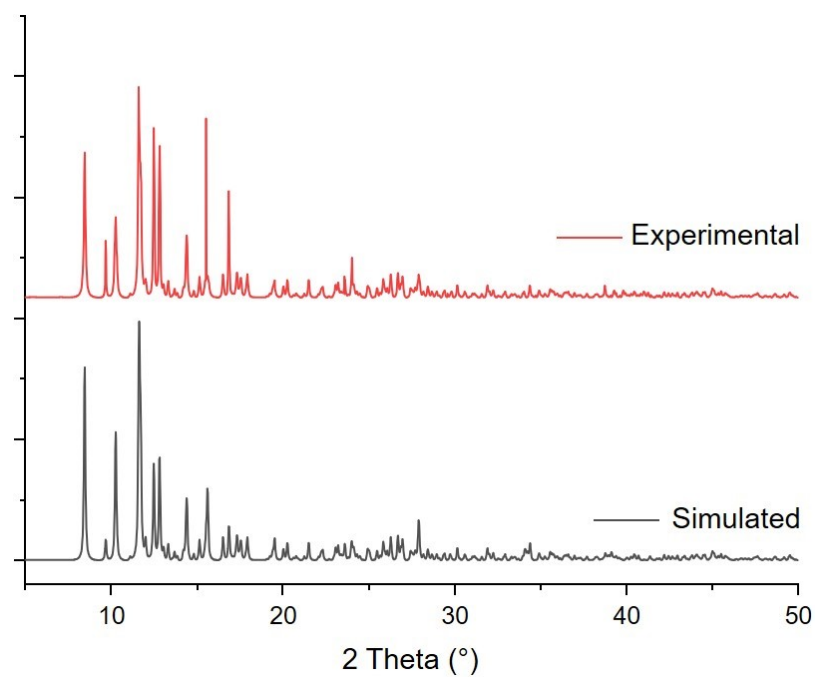

**Figure S3c.** Comparison of the experimental powder XRD pattern (red line) of complex **3** with the calculated one (black line). X-ray source; Copper  $K\alpha$  radiation.



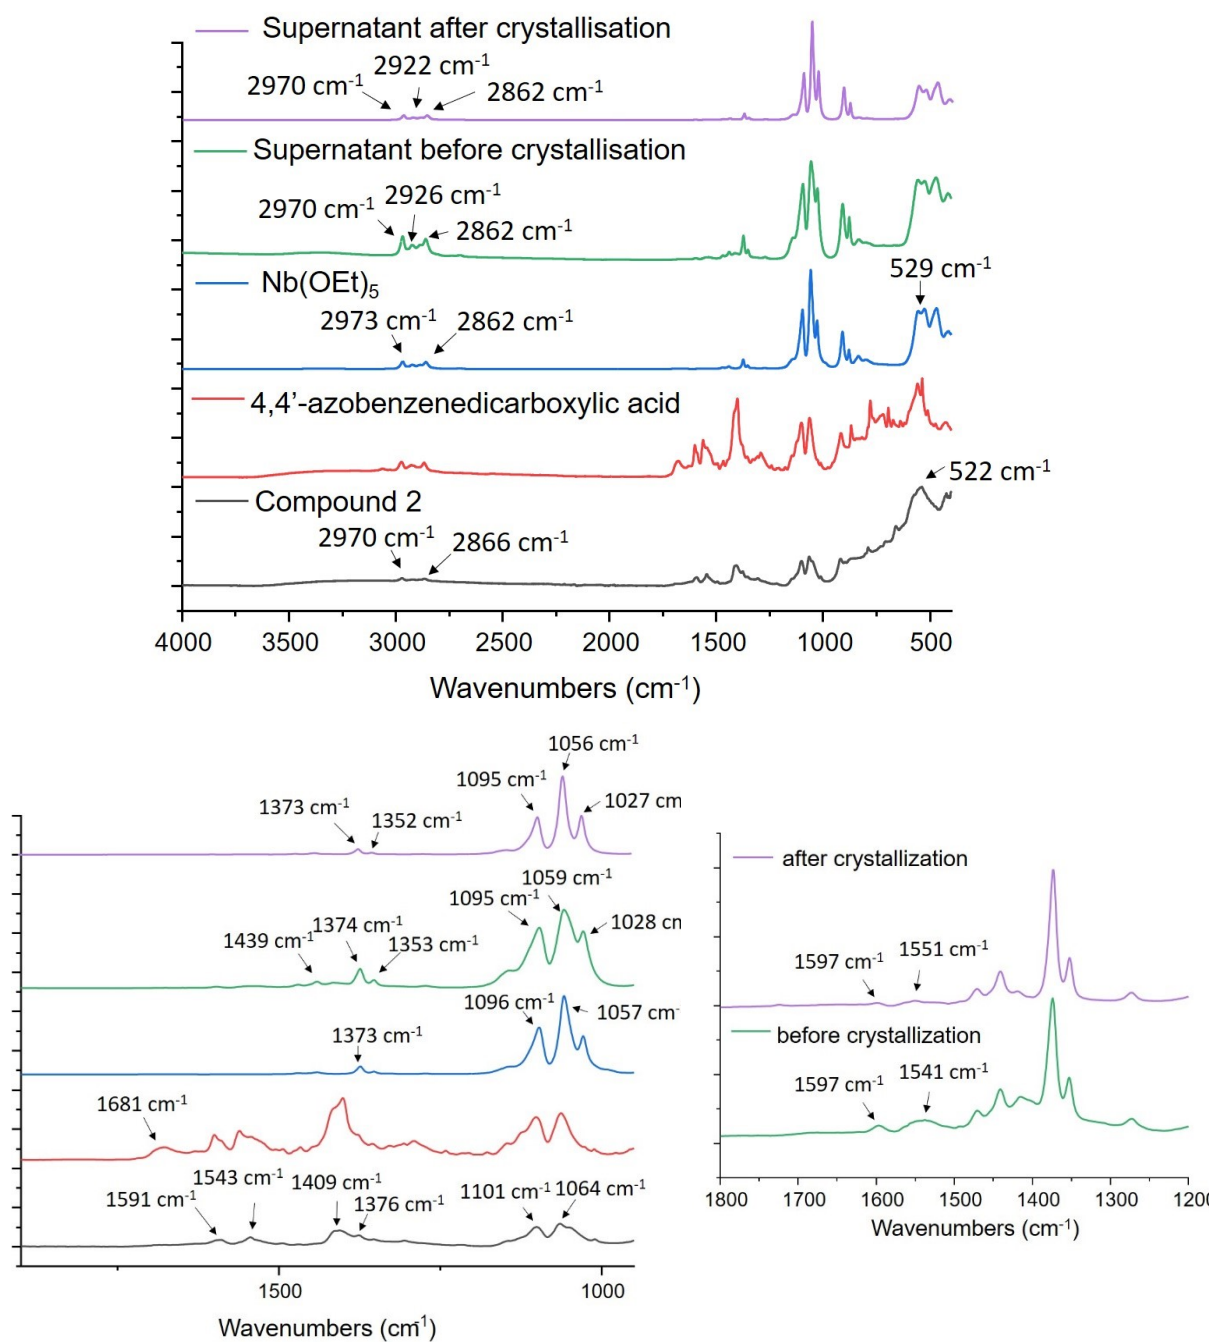

**Figure S4a.** Infrared spectroscopy analysis for the niobium(V) / 4,4'-azobenzenedicarboxylic acid system 2. Nb(OEt)<sub>5</sub> (blue line), 4,4'-azobenzenedicarboxylic acid (red line), supernatant solution after 1h mixing at room temperature (green), supernatant after crystallization for 1 week at room temperature (purple) and compound 2 (black line). Top: full spectrum in the 4000-400 cm<sup>-1</sup> range; bottom left: detailed region in the 1900-950 cm<sup>-1</sup> range; bottom right: highlight on the 1800-1200 cm<sup>-1</sup> region before and after crystallization.



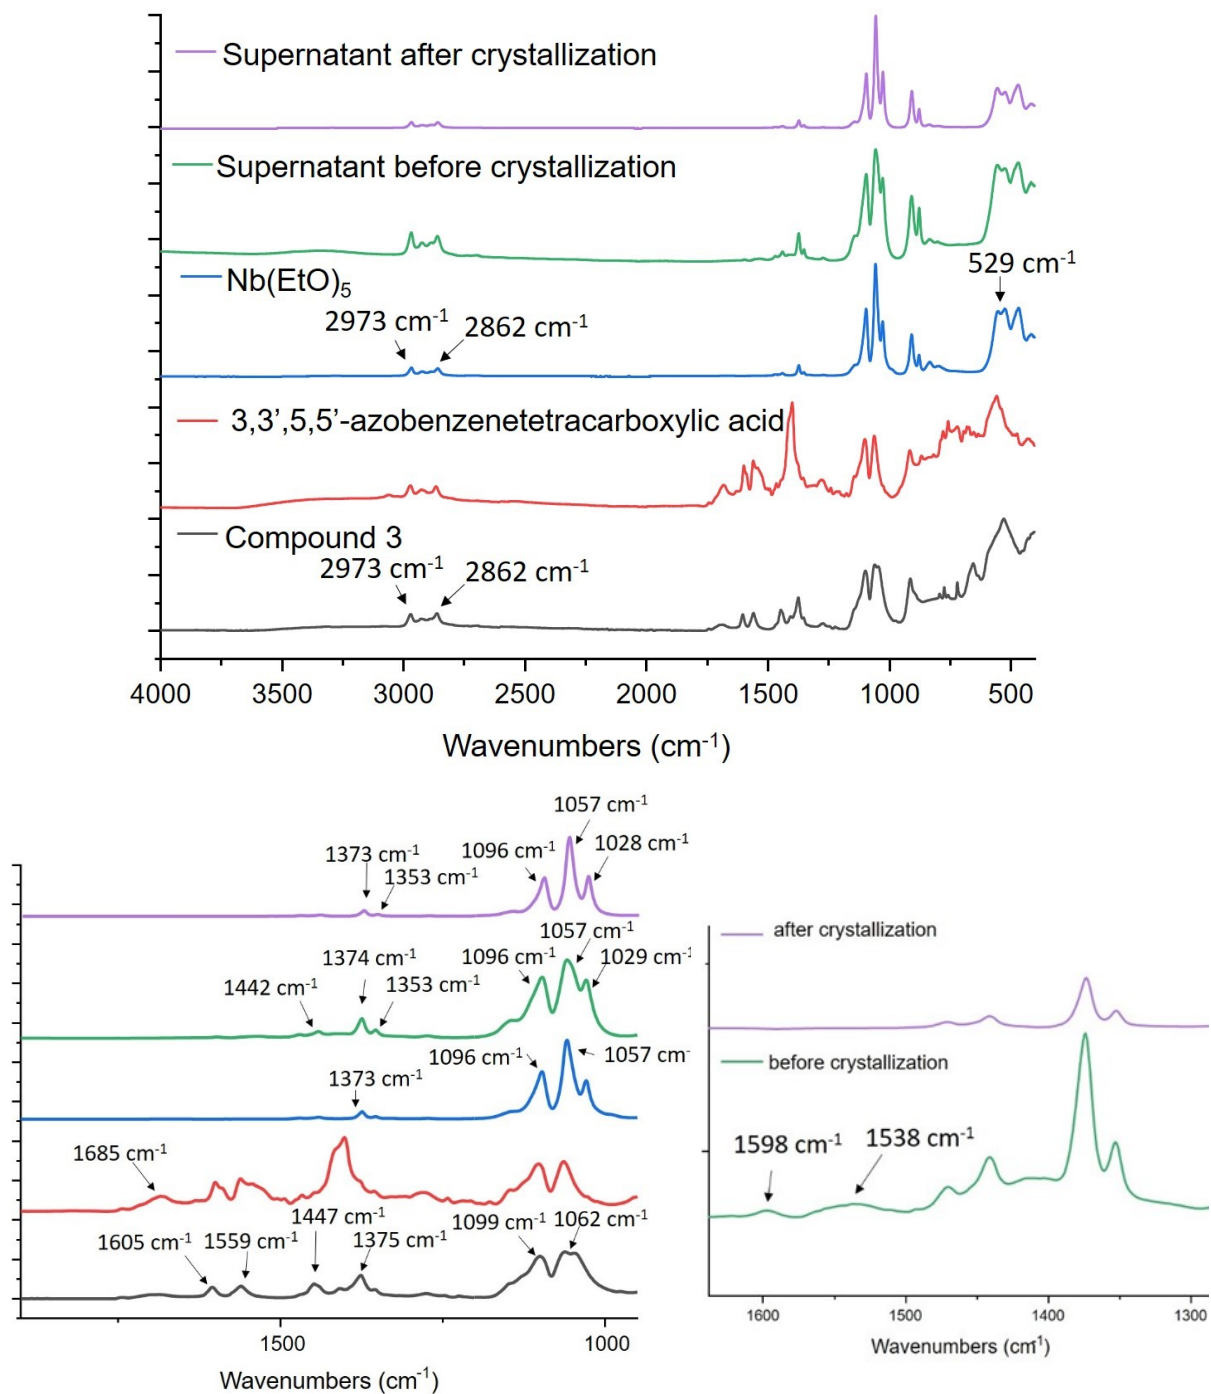

**Figure S4b.** Infrared spectroscopy analysis for the niobium(V) / 4,4'-azobenedicarboxylic acid system **3**. Nb(OEt)<sub>5</sub> (blue line), 3,3',5,5'-azobenzenetetracarboxylic acid (red line), supernatant solution after 1h mixing at room temperature (green), supernatant after crystallization for 1 month at room temperature (purple) and compound **3** (black line). Top: full spectrum in the 4000-400 cm<sup>-1</sup> range; bottom left: detailed region in the 1900-950 cm<sup>-1</sup> range; bottom right: highlight on the 1600-1300 cm<sup>-1</sup> region before and after crystallization.

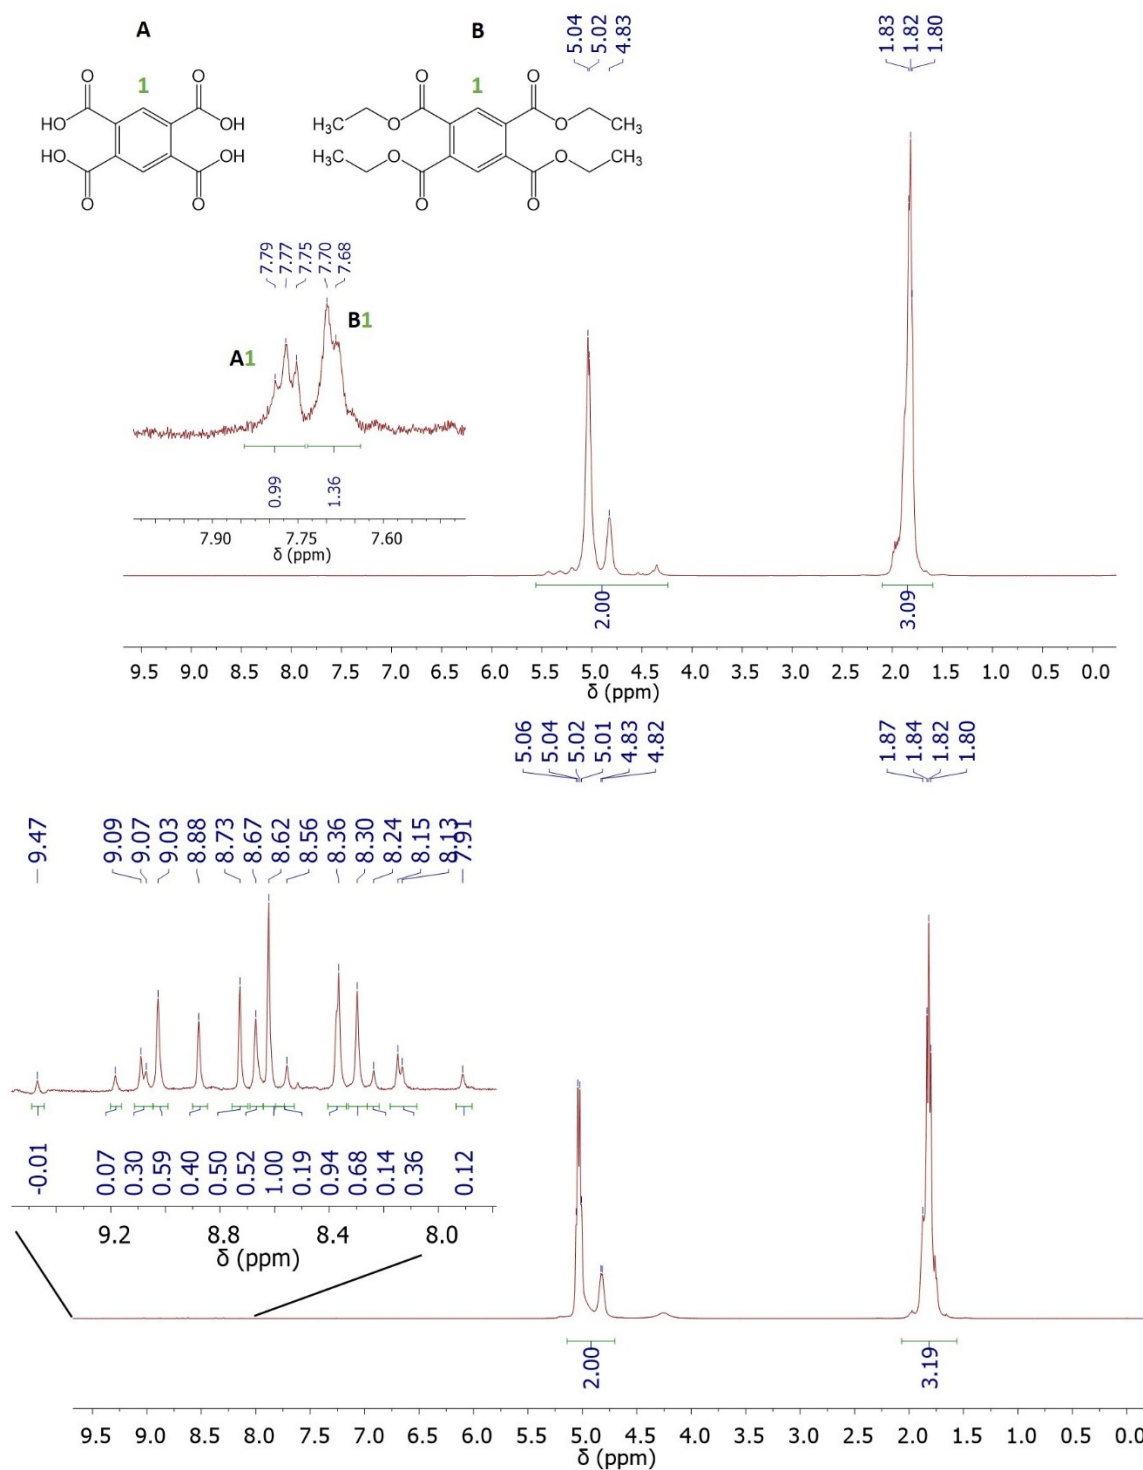

**Figure S5a.**  $^1\text{H}$  NMR spectra for the supernatant in the synthesis of complex **1** before (top) and after the crystallization (bottom) with a focus in the aromatic region.

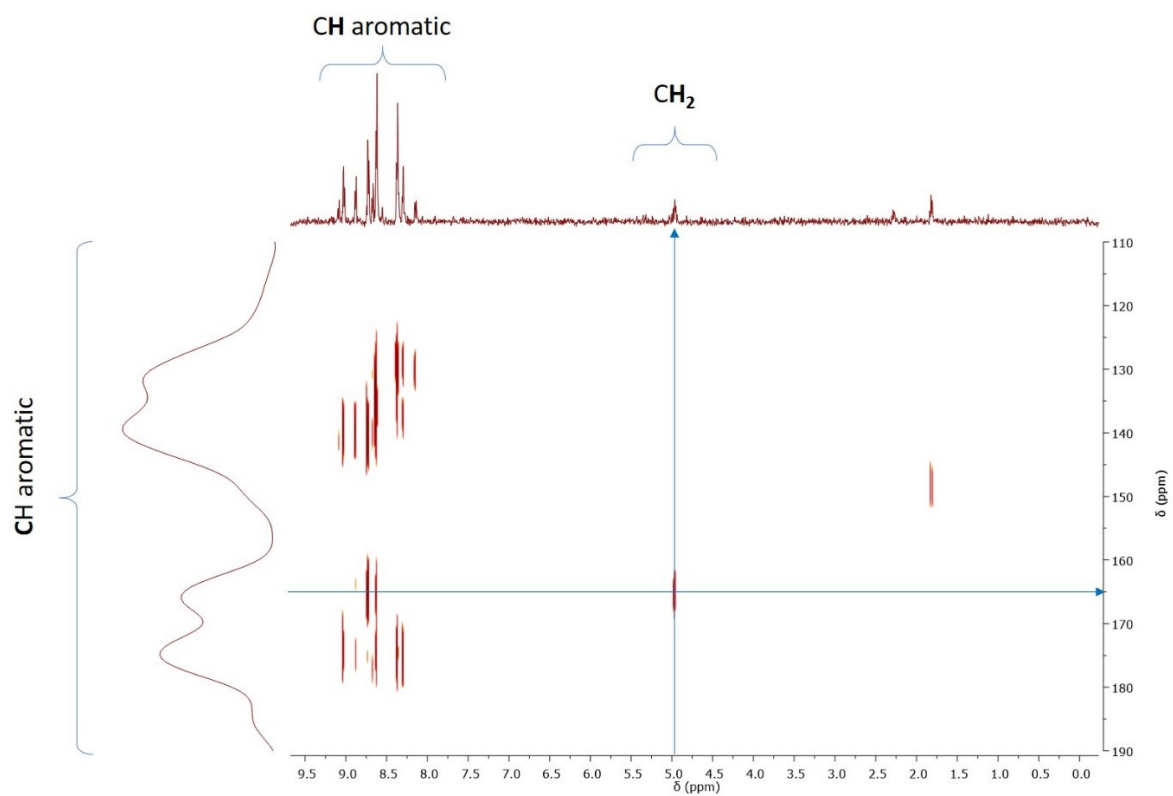

**Figure S5b:**  $^{13}\text{C}$ -HMBC spectrum for the supernatant solution of compound **1** after crystallization.
